# Supplementary material for: Atomic and Electronic Structure in MgO–SiO2
Source: PubMed Central journal article supplement (PMC10839830; doi:10.1021/acs.jpca.3c05561), 2024-01-18
Supplement: jp3c05561_si_001.pdf [file jp3c05561_si_001.pdf]

**Supporting Information**  
**Atomic and Electronic Structure in MgO–SiO<sub>2</sub>**

*Yuta Shuseki<sup>a,b</sup>, Shinji Kohara<sup>b,\*</sup>, Tomoaki Kaneko<sup>c</sup>, Keitaro Sodeyama<sup>b</sup>, Yohei Onodera<sup>b</sup>, Chihiro Koyama<sup>d</sup>, Atsunobu Masuno<sup>a,b</sup>, Shunta Sasaki<sup>e</sup>, Shohei Hatano<sup>e</sup>, Motoki Shiga<sup>f,g,h</sup>, Ippei Obayashi<sup>i</sup>, Yasuaki Hiraoka<sup>j</sup>, Junpei T. Okada<sup>k</sup>, Akitoshi Mizuno<sup>l</sup>, Yuki Watanabe<sup>m</sup>, Yui Nakata<sup>m</sup>, Koji Ohara<sup>n</sup>, Motohiko Murakami<sup>o</sup>, Matthew G. Tucker<sup>p</sup>, Marshall T. McDonnell<sup>q</sup>, Hirohisa Oda<sup>d</sup> and Takehiko Ishikawa<sup>r</sup>*

<sup>a</sup> *Graduate School of Engineering, Kyoto University, Kyoto 615-8520, Japan*

<sup>b</sup> *Center for Basic Research on Materials, National Institute for Materials Science (NIMS), Tsukuba, Ibaraki 305-0047, Japan*

<sup>c</sup> *Department of Computational Science and Technology, Research Organization for Information Science and Technology (RIST), Tokyo 105-0013, Japan*

<sup>d</sup> *Human Spaceflight Technology Directorate, Japan Aerospace Exploration Agency (JAXA), Tsukuba, Ibaraki 305-8505, Japan*

<sup>e</sup> *Graduate School of Science and Technology, Hirosaki University, Hirosaki, Aomori 036-8561, Japan*

<sup>f</sup> *Unprecedented-Scale Data Analytics Center, Tohoku University, Sendai, Miyagi 980-8578, Japan*

<sup>g</sup> *Graduate School of Information Science, Tohoku University, Sendai, Miyagi 980-8579, Japan*

<sup>h</sup> *RIKEN Center for Advanced Intelligence Project, Tokyo 103-0027, Japan*

<sup>i</sup> *Center for Artificial Intelligence and Mathematical Data Science, Okayama University, Okayama 700-8530, Japan*

<sup>j</sup> *Institute for the Advanced Study of Human Biology (WPI-ASHBi), Kyoto University, Kyoto 606-8303, Japan*

<sup>k</sup> *Institute for Materials Research, Tohoku University, Sendai, Miyagi 980-8577, Japan*

<sup>l</sup> *National Institute of Technology, Hakodate College, Hakodate, Hokkaido 042-8501, Japan*

<sup>m</sup> *Advanced Engineering Services Co., Ltd., Tsukuba, Ibaraki 305-0032, Japan*

<sup>n</sup> *Faculty of Materials for Energy, Shimane University, Matsue, Shimane 690-8504, Japan*

<sup>o</sup> *Department of Earth Sciences, ETH Zürich, Zürich 8092, Switzerland*

<sup>p</sup> *Neutron Scattering Division, Oak Ridge National Laboratory, Oak Ridge, Tennessee 37831, United States*

<sup>q</sup> *Computer Science and Mathematics Division, Oak Ridge National Laboratory, Oak Ridge, Tennessee 37830, United States*

<sup>r</sup> *Institute of Space and Astronautical Science, Japan Aerospace Exploration Agency (JAXA), Tsukuba, Ibaraki 305-8505, Japan*

\*Corresponding author: Shinji Kohara, email: KOHARA.Shinji@nims.go.jp

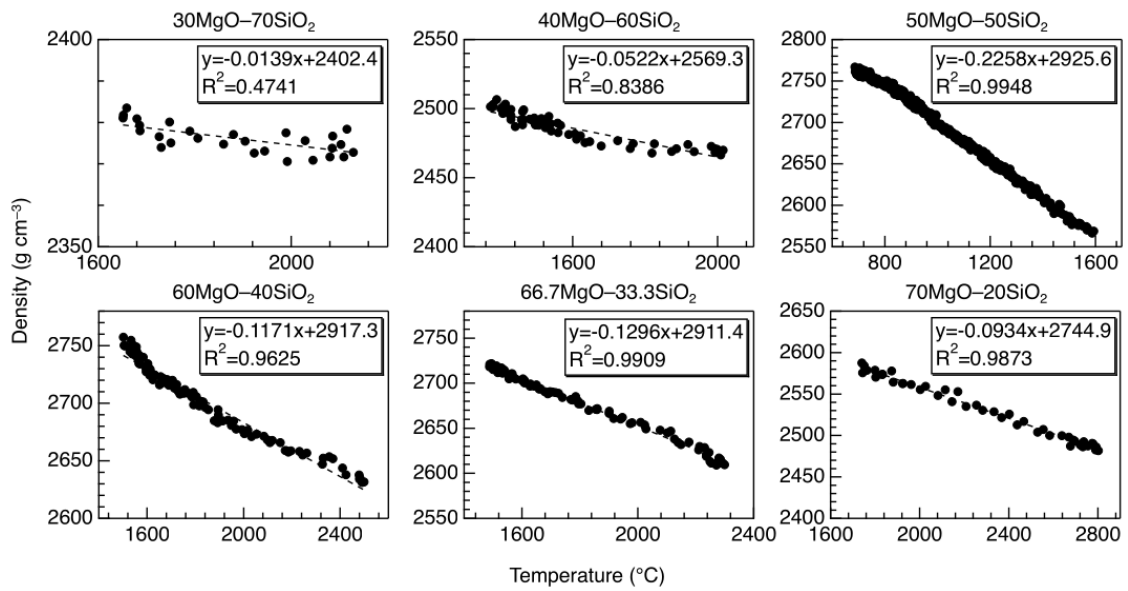

**Fig. S1** Measured density of  $l\text{-}x\text{MgO-(100-x)SiO}_2$  as a function of temperature.

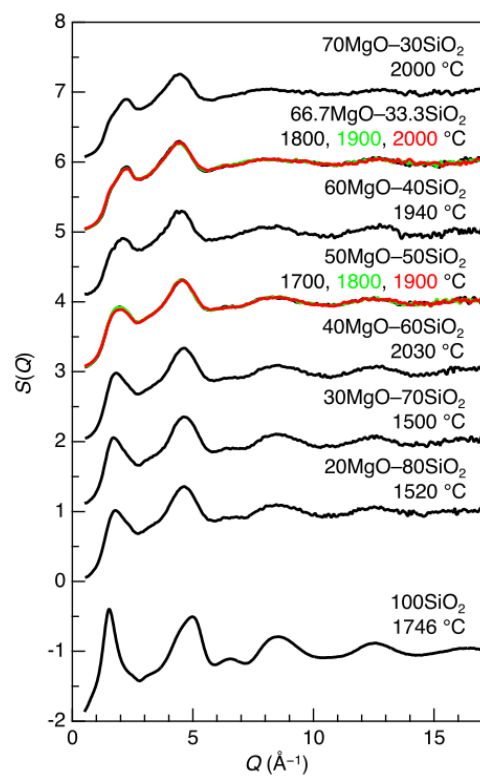

**Fig. S2** X-ray total structure factors,  $S(Q)$ , for  $l$ - $x$ MgO-(100- $x$ )SiO<sub>2</sub> and  $l$ -SiO<sub>2</sub><sup>1</sup>.

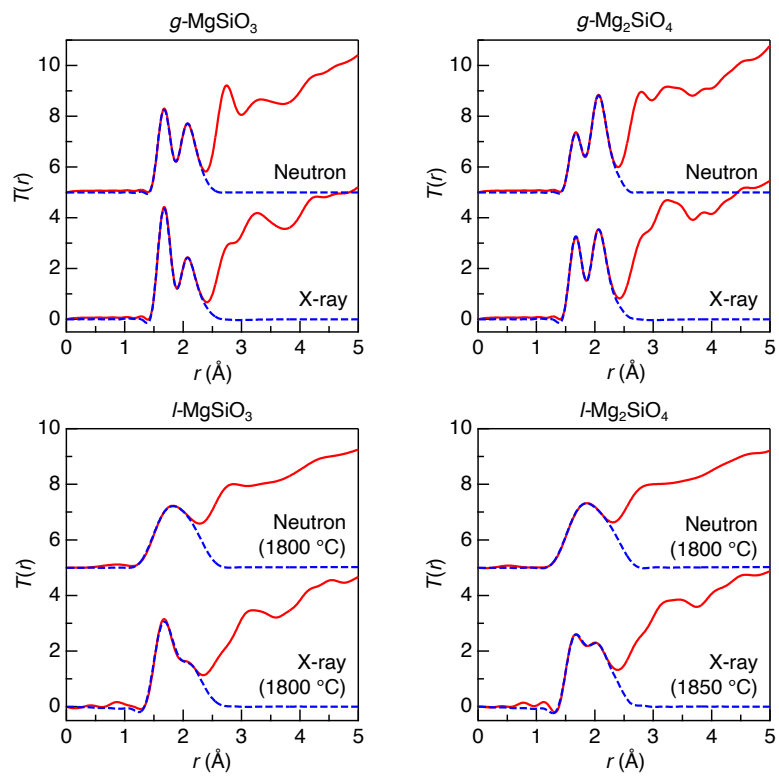

**Fig. S3** Pair function analysis of total correlation functions  $T(r)$ . Red; experimental data, blue; pair function.

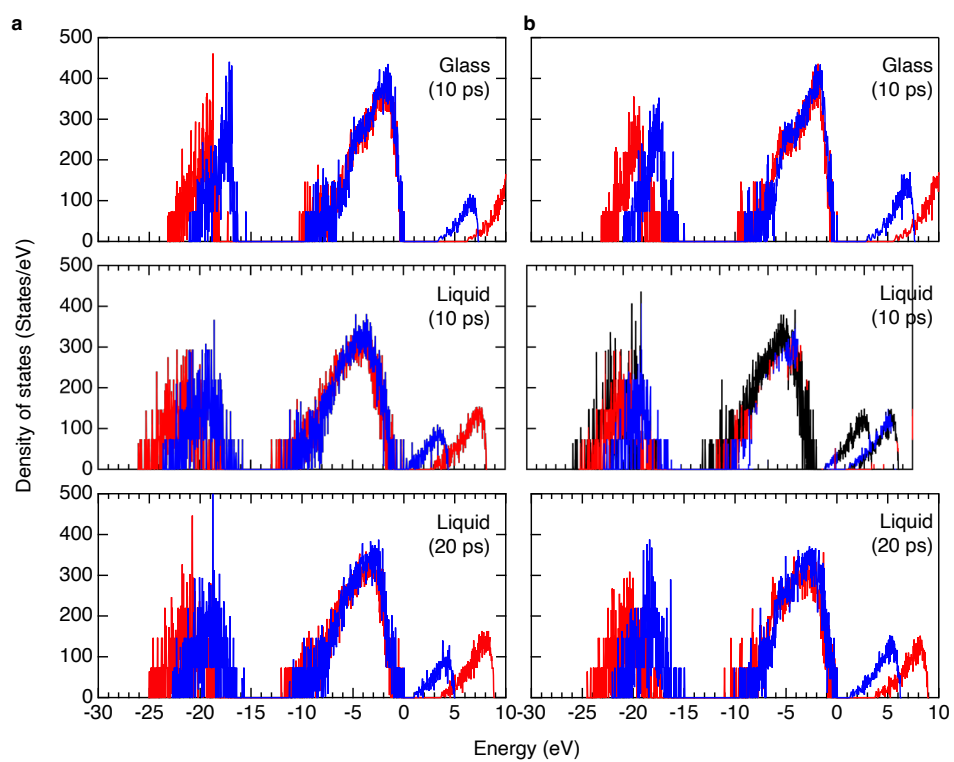

**Fig. S4** Electron density of states for **a** *g*- and *l*-MgSiO<sub>3</sub> and **b** *g*- and *l*-Mg<sub>2</sub>SiO<sub>4</sub> calculated by DF-MD simulations. Red; PBE0 (0.3), blue; GGA-PBE.

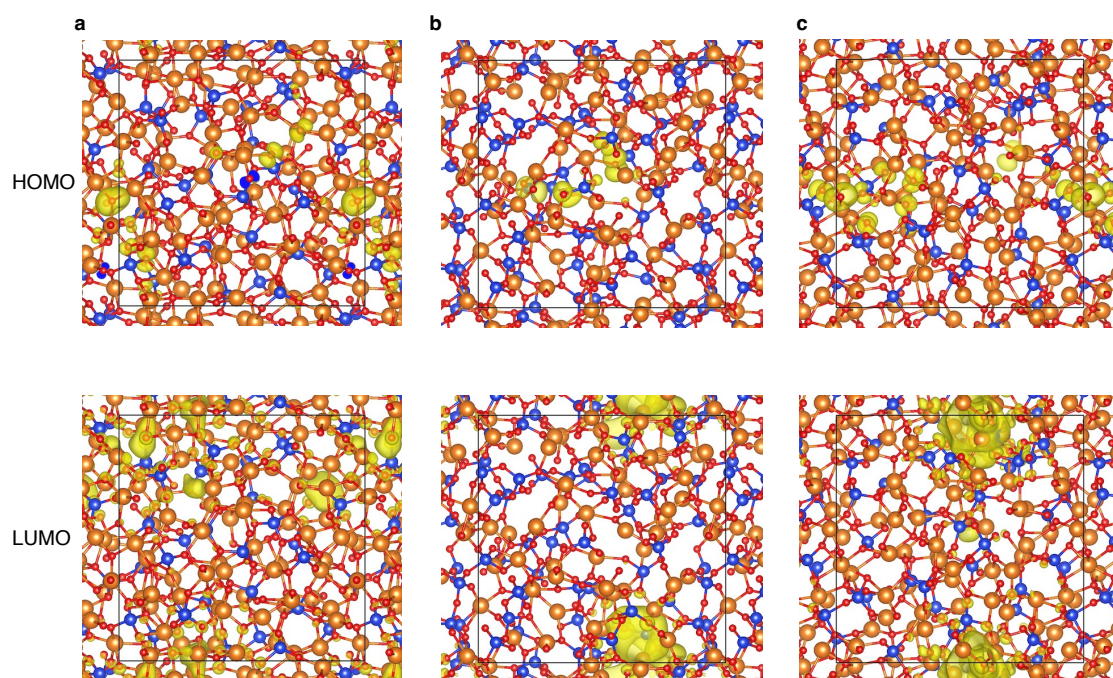

**Fig. S5** Isosurface plots of the partial charge density around the HOMO and the LUMO levels for **a** *g*-Mg<sub>2</sub>SiO<sub>4</sub> density of states, **b** *l*-MgSiO<sub>3</sub> (10 ps) and **c** *l*-Mg<sub>2</sub>SiO<sub>4</sub> (10 ps).

**Table S1** Coordination numbers obtained by pair function analysis of X-ray and neutron total correlation functions  $T(r)$ .

|                                            |         | $N_{\text{Si-O}}$ | $N_{\text{Mg-O}}$  |
|--------------------------------------------|---------|-------------------|--------------------|
| <i>l</i> -MgSiO <sub>3</sub>               | neutron | 3.85              | 4.8<br>(3.7+1.1)   |
|                                            | X-ray   | 3.85              | 4.8<br>(4.0+0.8)   |
| <i>g</i> -MgSiO <sub>3</sub>               | neutron | 3.95              | 5.0<br>(4.5+0.5)   |
|                                            | X-ray   | 3.95              | 5.0<br>(4.5+0.5)   |
| <i>l</i> -Mg <sub>2</sub> SiO <sub>4</sub> | neutron | 3.85              | 4.8<br>(3.55+1.25) |
|                                            | X-ray   | 3.85              | 4.8<br>(3.9+0.9)   |
| <i>g</i> -Mg <sub>2</sub> SiO <sub>4</sub> | neutron | 4.00              | 5.0<br>(4.4+0.6)   |
|                                            | X-ray   | 3.95              | 5.0<br>(4.5+0.5)   |

**Table S2** Coordination numbers obtained by DF–MD models.

| DF–MD model                                | $N_{\text{Si-O}}$<br>(cut off 1.9 Å) | $N_{\text{O-O}}$<br>(cut off 4.0 Å) | $N_{\text{Mg-O}}$<br>(cut off 2.8 Å) |
|--------------------------------------------|--------------------------------------|-------------------------------------|--------------------------------------|
| <i>l</i> -MgSiO <sub>3</sub>               | 3.84                                 | 11.24                               | 4.82                                 |
| <i>l</i> -Mg <sub>2</sub> SiO <sub>4</sub> | 3.88                                 | 11.82                               | 4.93                                 |
| <i>g</i> -MgSiO <sub>3</sub>               | 4.00                                 | 12.17                               | 5.19                                 |
| <i>g</i> -Mg <sub>2</sub> SiO <sub>4</sub> | 4.03                                 | 12.70                               | 5.15                                 |



**Table S3** Electron band gaps (eV) for several crystals calculated by GGA–PBE and PBE0.

| Method      | MgO                                | $\alpha$ -quartz       | MgSiO <sub>3</sub> | Mg <sub>2</sub> SiO <sub>4</sub>   |
|-------------|------------------------------------|------------------------|--------------------|------------------------------------|
| Exp.        | 7.7 <sup>2</sup> /7.8 <sup>3</sup> | 9.34-9.55 <sup>4</sup> | 8.9 <sup>5</sup>   | 8.4 <sup>6</sup> /8.8 <sup>5</sup> |
| GGA–PBE     | 4.82779                            | 5.53158                | 4.88708            | 5.27906                            |
| PBE0 (0.25) | 7.33461                            | 8.06809                | 7.44759            | 7.85018                            |
| PBE0 (0.30) | 7.84888                            | 8.58155                | 7.96749            | 8.37234                            |
| PBE0 (0.35) | 8.36677                            | 9.09690                | 8.48946            | 8.89693                            |

Values in brackets show fractions of the exact exchange term for the exchange correlation functional.

## References

1. Q. Mei *et al.* Structure of liquid SiO<sub>2</sub>: a measurement by high-energy X-ray diffraction. *Phys. Rev. Lett.* **98**, 057802 (2007).
2. S. Adachi, *Optical Properties of Crystalline and Amorphous Semiconductors: Numerical Data and Graphical Information* (Kluwer Academic, Dordrecht, 1999).
3. Roessler, D. M. & Walker, W. C. Electronic spectrum and ultraviolet optical properties of crystalline MgO. *Phys. Rev.* **159**, 733–738 (1967).
4. Tan, G. L. *et al.* Optical properties and London dispersion interaction of amorphous and crystalline SiO<sub>2</sub> determined by vacuum ultraviolet spectroscopy and spectroscopic ellipsometry. *Phys. Rev. B* **72**, 205117 (2005).
5. Nitsan, U. & Shankland, T. J. Optical properties and electronic structure of mantle silicates. *Geophys. J. Int.* **45**, 59–87 (1976).
6. Shankland, T. J. Band gap of forsterite. *Science* **161**, 51–53 (1968).
